## Evolutionary history limits species' ability to match color sensitivity to available habitat light

Matthew J. Murphy<sup>1\*†</sup> and Erica L. Westerman<sup>1‡§</sup>

<sup>1</sup>Department of Biological Sciences, University of Arkansas, Fayetteville, AR 72701

\* Author for correspondence: [mjm052@uark.edu](mailto:mjm052@uark.edu)

† ORCID: 0000-0002-2683-3348

‡ [ewesterm@uark.edu](mailto:ewesterm@uark.edu)

§ ORCID: 0000-0002-3575-8298

1 **Abstract**

2 The spectrum of light that an animal sees – from ultraviolet to far red light – is governed by the  
3 number and wavelength sensitivity of a family of retinal proteins called opsins. It has been  
4 hypothesized that the spectrum of light available in an environment influences the range of  
5 colors that a species has evolved to see. However, invertebrates and vertebrates use  
6 phylogenetically distinct opsins in their retinae, and it remains unclear whether these distinct  
7 opsins influence what animals see, or how they adapt to their light environments. Systematically  
8 utilizing published visual sensitivity data from across animal phyla, we found that terrestrial  
9 animals are more sensitive to shorter and longer wavelengths of light than aquatic animals, and  
10 that invertebrates are more sensitive to shorter wavelengths of light than vertebrates. Controlling  
11 for phylogeny removes the effects of habitat and lineage on visual sensitivity. Closed and open  
12 habitat terrestrial species have similar spectral sensitivities when comparing across the Metazoa,  
13 and deep water animals are more sensitive to shorter wavelengths of light than shallow water  
14 animals. Our results suggest that animals do adapt to their light environment, however the  
15 invertebrate-vertebrate evolutionary divergence has limited the degree to which animals can  
16 perform visual tuning.

17 **Keywords:** visual tuning, light environment, ciliary opsin, rhabdomeric opsin,  $\lambda_{\max}$

18

## 19 **1. Introduction**

20 Animals use vision for many tasks, including finding prey, avoiding toxic animals and plants,  
21 identifying predators, assessing mate quality, and navigating their environment [1–5]. In many  
22 cases, the objects of interest to the animal need to be distinguished from the background [6,7]. For  
23 example, food that does not contrast with the background is harder for foragers to detect than food  
24 that does contrast with the background [8–12]. Signals that contrast with background colours and  
25 patterns are also used for mating displays [13–18]. Furthermore, many species' body colour  
26 patterns have evolved to be simultaneously cryptic to predators while conspicuous to intended  
27 receivers [19–21]. Finally, contrasting colours can improve animals' ability to learn the meaning  
28 of signals, as when chicks learn more quickly to avoid bitter, aposematically coloured food  
29 [2,3,22].

30

31 An animal's ability to detect visual information depends upon the colour and amount of light in its  
32 habitat, otherwise known as the *light environment* [6,23,24]. For example, red and blue light are  
33 filtered out by chloroplasts, lending forests and estuarine environments a yellow-green cast [24–  
34 26]. Likewise, the water column progressively filters red and UV light [23,24]. Animals' signalling  
35 behaviours, choice of microhabitat, and visual physiology are thus expected to co-evolve to suit  
36 their light environment [6].

37

38 Sighted species' photoreceptors (the light-absorbing neurons which enable vision) are theorized to  
39 have undergone adaptation to best absorb the light most often present in their environments [23].

40 This process, called *visual tuning*, is made possible by both filtering pigments [27–35] and  
41 differences in the amino acid sequence or 3-dimensional shape of photosensitive proteins called  
42 *opsins* [23]. Visual tuning has been found to shift wavelengths of maximum sensitivity in species  
43 as diverse as birds, fish, and mammals [23,36,45,46,37–44]. Although the effect of light  
44 environment on vision has been extensively studied in fish [47,48], a systematic study of visual  
45 tuning in terrestrial animals has not yet occurred; neither have terrestrial animals been  
46 systematically compared to aquatic species. Both aquatic and terrestrial animals are found in a  
47 variety of light environments, and multiple phyla have independently made the water-to-land  
48 habitat transition. Additionally, studies of animals which transition from aquatic larvae to  
49 terrestrial adults have found that these species change their visual pigment expression patterns in  
50 a manner that matches their changing light environment [49–53]. Understanding whether  
51 phylogeny constrains the extent of visual tuning, particularly during these water-to-land  
52 transitions, is critical for understanding the evolutionary ecology of animal vision.

53

54 If opsin tuning faces phylogenetic constraints, the evolutionary history of animal vision may have  
55 shaped the degree to which different phyla have adapted to their light environments. The types of  
56 opsins differ between chordates and other phyla [54]. Chordates use c-opsins in cilia-bearing  
57 photoreceptors to transduce photons into vision, while non-chordate animals use r-opsins in  
58 rhabdomere-bearing photoreceptors; no animals have been identified that use both c- and r-type  
59 photoreceptors for vision [55]. Phylogenetic analyses reveal that c- and r-opsins diverged 400  
60 million years ago and were likely both present in the urbilaterian, with r-opsins closely related to  
61 the melanopsins used by chordates for non-visual tasks [55]. The r-opsin/ c-opsin divergence may  
62 have given rise to different degrees of tuning between chordates and non-chordates.

63

64 The diverse habitats in which animals live, combined with the long evolutionary history of visual  
65 pigments, leads to several questions. First, have transitions from aquatic to terrestrial habitats  
66 influenced the spectra of light that animals can see? And, are differences in the spectra that animals  
67 can see associated with the c-opsin/ r-opsin divergence? Second, do animals that live in visual  
68 environments that filter red and blue light, such as closed-canopy forests and estuarine habitats,  
69 see colours more similarly to each other than to open terrestrial or freshwater aquatic  
70 environments, in which colours are less (if at all) strongly filtered? And, if there is an effect of  
71 habitat greenness, is this effect outweighed by phylogeny?

72

73 To answer these questions, we performed a phylogenetically weighted systematic analysis of the  
74 maximum and minimum wavelength of visual sensitivity, as well as the range of visual sensitivity,  
75 across animals.

76

## 77 **(2) Materials and method**

78 *Paper selection:* We conducted Google Scholar searches in October 2017 and January 2018. Our  
79 first search used the search pattern “*visual pigment*” OR *opsin* OR “*absorbance spectrum*” “*λ*  
80 *max*” -*human* -*man* -*men* -*woman* -*women* -“*Homo sapiens*” -*disease* -*regeneration*. We  
81 conducted a second Google Scholar search using the search pattern *visual pigment*, *opsin*  
82 *sensitivity*, *absorbance spectrum*. For both searches, we excluded citations and patents.

83

84 We reviewed candidate articles using a three-step process. First, we screened by title and abstract  
85 to identify original research articles and review papers that examined animal visual physiology.  
86 We then screened articles to determine if they used microspectrophotometry, electrophysiology,  
87 pigment extraction, or *in vitro* mRNA expression followed by spectrophotometry, and that they  
88 measured visual sensitivity or visual pigment absorption from at least two animals. Finally, we  
89 only kept articles which used animals that were wild-caught or reared in full-spectrum light  
90 conditions, to avoid any effects of artificial lighting on visual sensitivity [56,57].

91

92 For review articles, we determined whether the authors had included measurements of the mean  
93 wavelength of peak sensitivity ( $\lambda_{\max}$ ) of some population in the article's figures or tables. We  
94 downloaded the corresponding primary sources and filtered them using the process described  
95 above.

96

97 Visual pigment sensitivity data: We recorded the following data for each species of each paper that  
98 passed our filters: 1) mean wavelength of peak sensitivity ( $\lambda_{\max}$ ) for each visual pigment measured;  
99 2) number of animals measured ( $n$ ); 3) standard deviation of the mean  $\lambda_{\max}$  (SD) (when available);  
100 and 4) where animals were caught (when available). We calculated sampling error for visual  
101 pigments when possible.

102

103 Habitat data: We used standardized data sources to classify each species by habitat. Sources  
104 included field guides [58–60], public databases (BugGuide, <bugguide.net>, Butterflies and Moths  
105 of North America, <butterfliesandmoths.org>, FishBase <fishbase.org>, SealifeBase

106 <[sealifebase.org](http://sealifebase.org)>, IUCN Redlist (<[iucnredlist.org](http://iucnredlist.org)>)) and online encyclopaedias including Animal  
107 Diversity Web (<[animaldiversity.org](http://animaldiversity.org)>) and Encyclopedia of Life (<[eol.org](http://eol.org)>). After first  
108 classifying species as terrestrial or aquatic, we then defined terrestrial sub-habitats: rainforest,  
109 forest, woodland, shrubland, grassland, and desert. We recategorized these habitats into three  
110 habitat types based on canopy density. Rainforest and temperate forest were designated as “closed”  
111 habitats. Woodland was considered to have “intermediate” canopy density [25]. Shrubland,  
112 grassland, and desert were classified as "open" habitats.

113

114 Aquatic habitats included river, stream, pond, lake, coastal, estuarine, open-water marine, bottom-  
115 dwelling marine, abyssopelagic, abyssodemersal, bathypelagic, and bathydemersal habitats. We  
116 recategorized these habitats into two habitat types based on salinity. River, stream, pond, and lake  
117 habitats were considered "freshwater" habitats; while coastal, estuarine, open-water marine, and  
118 bottom-living marine habitats were "marine" habitats. Animals considered "coastal" were those  
119 described as living in water along the coast, near shore, or in estuaries. We also recategorized these  
120 habitats into two habitat types based on whether light was abundant or not. Abyssopelagic,  
121 abyssodemersal, bathypelagic, and bathydemersal habitats receive little or no sunlight due to their  
122 depth in the water column and were considered "lightless" habitats. Species that were considered  
123 by our sources as deep-water species were also considered species that lived in "lightless" habitats.  
124 All other habitats were considered "lit" habitats. Finally, we used FishBase, SealifeBase or field  
125 guides to identify the minimum and maximum depths for each species. We then used these data to  
126 calculate average depth per species ( $D_{\text{average}} = (D_{\text{max}} + D_{\text{min}}) * 2^{-1}$ ).

127

128 Phylogenetic control:

129 To control for the effect of evolutionary relatedness on visual sensitivity we built a phylogenetic  
130 tree of all animals in our analysis (see the electronic supplementary material: figure S1). We used  
131 the function `tnrs_match_names` in the R package *rotl* [61] to acquire data from the Open Tree of  
132 Life database ([tree.opentreeoflife.org](http://tree.opentreeoflife.org)) for each of the species represented in our regression, and  
133 to generate a phylogenetic tree using default arguments and excluded species flagged as *incertae*  
134 *cedis*; i.e., with uncertain phylogenetic position (25 species) and species which had no sequencing  
135 data in the Open Tree of Life database (6 species). We created an induced subtree with the resulting  
136 data using the function `tol_induced_subtree` in the package *rotl*.

137

138 Trees produced using *rotl* are unrooted, without branch lengths, and sometimes with unresolved  
139 polytomies. We used the R packages *phytools* [62] and *ape* [63] to resolve these issues. We used  
140 the `root` function in *ape* to root the tree using *Saccharomyces cerevisiae* (otid: 5262624) from  
141 [tree.opentreeoflife.org](http://tree.opentreeoflife.org)) as the outgroup. We computed branch lengths using the `compute.brln`  
142 function in *ape* with default arguments. Finally, we randomly resolved polytomies using the  
143 `multi2di` function in *ape* with default parameters. Subtrees of the primary tree were constructed as  
144 needed using the `drop.tips` function in *ape*.

145

146 Statistical Analyses:

147 To determine whether longest  $\lambda_{\max}$ , shortest  $\lambda_{\max}$ , and range of  $\lambda_{\max}$  followed the normal  
148 distribution, we used the `shapiro.test` function in R. To determine whether the variances of longest



149  $\lambda_{\max}$ , shortest  $\lambda_{\max}$ , and range of  $\lambda_{\max}$  differed between broad habitat type (aquatic or terrestrial) or  
150 lineage (invertebrates or vertebrates) we used `levene.test` function in R.

151

152 To determine whether there was an effect of broad habitat type or lineage on the longest  $\lambda_{\max}$ ,  
153 shortest  $\lambda_{\max}$ , and range of  $\lambda_{\max}$ , we used the `glm` function in R to construct generalized linear  
154 models with the formula  $\lambda_{\max} \sim \text{broad habitat} * \text{lineage}$ .

155

156 To determine whether phylogeny could explain extant differences in longest  $\lambda_{\max}$ , shortest  $\lambda_{\max}$ ,  
157 and range of  $\lambda_{\max}$  between broad habitat type or lineage, we constructed phylogenetically  
158 controlled linear models using the `phylolm` function in the *phylolm* [64] package for R with the  
159 formula  $\lambda_{\max} \sim \text{broad habitat} * \text{lineage}$  with a bootstrap of 100. Since we had to exclude 31 species  
160 from our phylogenetic tree, we first ran the `glm` described above with the trimmed data set, and  
161 then compared those results to the results of our `phylolm` models. For these models, we used the  
162 overall phylogenetic tree and our trimmed dataset.

163

164 We then subset our overall dataset for terrestrial animals and aquatic animals, re-tested for normal  
165 distributions and variances, and conducted a set of statistical analyses specific to terrestrial or  
166 aquatic animals. To determine whether there was an effect of terrestrial habitat type (closed,  
167 intermediate, or open) or lineage on longest  $\lambda_{\max}$ , shortest  $\lambda_{\max}$ , and range of  $\lambda_{\max}$ , we used the `glm`  
168 function with the formula  $\lambda_{\max} \sim \text{terrestrial habitat type} * \text{lineage}$ . However, since there were only  
169 2 species that were intermediate habitat specialists, and they had similar visual spectra to those in  
170 closed canopies, we combined closed and intermediate habitat treatments into a single treatment,

171 closed\_intermediate, and re-ran the generalized linear models described above using the new  
172 habitat treatment levels (closed\_intermediate vs open).

173

174 We examined the effects of depth and habitat on visual sensitivities of aquatic animals. To  
175 determine whether there were effects of minimum, maximum, or average depth of habitat on  
176 longest  $\lambda_{\max}$ , shortest  $\lambda_{\max}$ , and range of  $\lambda_{\max}$  among aquatic species, we constructed linear models  
177 using the `lm` command with the formula  $\lambda_{\max} \sim \text{depth}$ . To determine whether phylogeny could  
178 explain extant differences in minimum, maximum, or average depth of habitat among longest  $\lambda_{\max}$ ,  
179 shortest  $\lambda_{\max}$ , and range of  $\lambda_{\max}$  among aquatic species, we first re-ran the linear models without  
180 the species excluded from our phylogenetic tree, and then constructed phylogenetically controlled  
181 linear models using the `phylolm` function in the *phylolm* package for R with the formula  $\lambda_{\max} \sim$   
182 `depth` with a bootstrap of 100. For these models, we used a subtree of our overall phylogenetic tree  
183 (see above), which omitted all terrestrial species.

184

185 Finally, we subset our overall dataset for open terrestrial animals and non-deep water aquatic  
186 animals (both freshwater and coastal) and conducted the following analyses. To assess whether  
187 the visual systems of animals in open terrestrial habitats were more similar to the visual systems  
188 of animals in open water habitats (coastal or freshwater) than those of closed terrestrial habitats  
189 we compared the longest  $\lambda_{\max}$ , shortest  $\lambda_{\max}$ , and range of  $\lambda_{\max}$ , of species in coastal-aquatic,  
190 freshwater-aquatic, terrestrial-closed, and terrestrial-open habitats using the `kruskal.wallis`  
191 function in R. Following this, we performed a pairwise (Steel-Dwass) test using the `dscfAllPairs`  
192 function in the R package *PCMCRRplus* [65]. To determine whether phylogeny could explain extant

193 differences in longest  $\lambda_{\max}$ , shortest  $\lambda_{\max}$ , and range of  $\lambda_{\max}$  between animals living in these four  
194 habitat types we re-ran the above analyses only using species in our phylogenetic tree, and then  
195 constructed phylogenetically controlled linear models using the `phylolm` function in the *phylolm*  
196 package for R with using the following formula with a bootstrap of 100:  $\lambda_{\max} \sim \text{coastal-aquatic} +$   
197  $\text{freshwater-aquatic} + \text{terrestrial-closed}$  and  $\lambda_{\max} \sim \text{coastal-aquatic} + \text{freshwater-aquatic} + \text{terrestrial-}$   
198  $\text{open}$ .

199

### 200 **(3) Results**

201 Our dataset included 1,114 opsins from 446 species, extracted from a total of 156 articles (See the  
202 electronic supplementary materials: table S1). Of these, 868 opsins were recorded from 355 aquatic  
203 species, and 246 opsins were recorded from 91 terrestrial species. Our data were not normally  
204 distributed (Shapiro-Wilk test: longest  $\lambda_{\max}$ :  $p < 0.05$ ,  $W = 0.94$ ; shortest  $\lambda_{\max}$ :  $p < 0.05$ ,  $W = 0.83$ ;  
205 range of  $\lambda_{\max}$ :  $p < 0.05$ ,  $W = 0.70$ ). Shortest, but neither longest nor range of  $\lambda_{\max}$  were found to  
206 have equal variances when compared across broad habitat and lineage (Levene's test: longest  $\lambda_{\max}$ :  
207  $p = 0.16$ ,  $t = 1.74$ ; shortest  $\lambda_{\max}$ :  $p < 0.05$ ,  $t = 25.28$ ; range of  $\lambda_{\max}$ :  $p < 0.05$ ,  $t = 21.62$ ).

208

209 (a) *Terrestrial species were maximally sensitive to longer wavelengths of light than aquatic*  
210 *species*

211 Terrestrial species were maximally sensitive to longer wavelengths of light than aquatic species,  
212 independent of opsin type (GLM,  $n=433$ : habitat  $p = 3.83 \times 10^{-8}$ ,  $t = 5.600$ , lineage  $p = 0.309$ ,  $t = -$   
213  $1.019$ ; interaction:  $p = 0.595$ ,  $t = -0.532$ ;  $\lambda_{\max}$  longest long-wavelength terrestrial species:  $535 \pm 41.6$

214 nm, aquatic species: 506±30.6 nm, invertebrate species: 513±38.9 nm, vertebrate species:  
215 512±33.0 nm) (figure 1a).

216

217 (b) Terrestrial species saw shorter wavelengths of light than aquatic species

218 Terrestrial species were maximally sensitive to shorter wavelengths of light than aquatic species,  
219 but there was a significant interaction between habitat and lineage: aquatic vertebrate species were  
220 more sensitive to short wavelengths than aquatic invertebrate species, but terrestrial invertebrate  
221 species were more sensitive to short wavelengths than terrestrial vertebrate species. Additionally,  
222 invertebrates trended towards seeing short wavelengths of light (GLM, n = 433: habitat p = 0.045,  
223 t = -2.012, lineage p = 0.051, t = 1.960, interaction: p = 2.34\*10<sup>-3</sup>; t = -3.061;  $\lambda_{\max}$  shortest short-  
224 wavelength terrestrial species: 442±79.2 nm, aquatic species: 476±39.3 nm; invertebrate species:  
225 466±70.2 nm, vertebrate species: 471±41.3 nm) (figure 1b).

226

227 (c) Terrestrial species and invertebrates saw a larger range of colours than aquatic species  
228 and vertebrates

229 Terrestrial species saw a larger range of colours than aquatic species. In addition, there was a  
230 significant interaction between habitat and lineage: aquatic invertebrates saw a narrower range of  
231 colours than aquatic vertebrates, but terrestrial invertebrates saw a broader range of colours than  
232 terrestrial vertebrates (GLM, n = 443: habitat p = 2.51\*10<sup>-6</sup>, t = 4.772, lineage p = 0.03, t = -2.184,  
233 interaction: p = 0.00261; t = 2.232;  $\lambda_{\max}$  range terrestrial species: 92±85.6 nm, aquatic species:  
234 30.9±51.6 nm; invertebrate species: 47.2±80.4 nm, vertebrate species: 40.7±56.7 nm) (figure 1c).

235 (d) Accounting for phylogeny removes the effect of habitat and lineage on visual pigment  
 236 sensitivity

237 When we ran our analyses with only the subset of species included in our phylogenetic tree, we  
 238 found that we lost the effect of lineage on the range of visual pigment sensitivity but did not lose  
 239 the effect of lineage on the longest or shortest wavelengths of maximum sensitivity (see the  
 240 electronic supplementary materials: tables S2 and S3). With this in mind, we controlled for  
 241 phylogeny. Controlling for phylogeny removed the effect of habitat and lineage on longest  $\lambda_{\max}$ ,  
 242 shortest  $\lambda_{\max}$  and range of  $\lambda_{\max}$  (table 1).

**Table 1.** No effect of habitat or lineage on visual sensitivity following phylogenetic control.

| Variable                 | <i>Longest <math>\lambda_{\max}</math></i> |          |           | <i>Shortest <math>\lambda_{\max}</math></i> |          |           | <i><math>\lambda_{\max}</math> Range</i> |          |           |
|--------------------------|--------------------------------------------|----------|-----------|---------------------------------------------|----------|-----------|------------------------------------------|----------|-----------|
|                          | <i>p</i>                                   | <i>t</i> | <i>SE</i> | <i>p</i>                                    | <i>t</i> | <i>SE</i> | <i>p</i>                                 | <i>t</i> | <i>SE</i> |
| <i>Habitat</i>           | 0.257                                      | -1.13    | 11.4      | 0.439                                       | 0.774    | 17.0      | 0.226                                    | -1.211   | 21.7      |
| <i>Lineage</i>           | 0.953                                      | 0.058    | 12.5      | 0.940                                       | 0.075    | 18.5      | 0.978                                    | -0.028   | 23.7      |
| <i>Habitat * Lineage</i> | 0.474                                      | -0.72    | 20.3      | 0.214                                       | -1.25    | 30.1      | 0.552                                    | 0.596    | 38.6      |

243

244 (e) Forest-woodland and open habitat species have similar spectral sensitivities

245 There was no effect of tree canopy openness on  $\lambda_{\max}$ , shortest  $\lambda_{\max}$ , and range of  $\lambda_{\max}$  (table 2; see  
 246 the electronic supplementary materials: figure S2, table S4 and table S5).

**Table 2.** Effect of habitat greenness on shortest  $\lambda_{\max}$ . P-values are above diagonal; q-values are below diagonal. Numbers in bold are statistically significant.

| q \ p                        |                | <i>Forest + Intermediate</i> | <i>Freshwater</i>           | <i>Open Terrestrial</i>     | <i>Mean (nm)</i>            | <i>SD (nm)</i> |
|------------------------------|----------------|------------------------------|-----------------------------|-----------------------------|-----------------------------|----------------|
|                              | <i>Coastal</i> | --                           | <b>5.75*10<sup>-7</sup></b> | 0.903                       | <b>3.92*10<sup>-6</sup></b> | 254.4          |
| <i>Forest + Intermediate</i> | <b>-7.54</b>   | --                           | <b>2.62*10<sup>-5</sup></b> | 0.24                        | 470.4                       | 68             |
| <i>Freshwater</i>            | -0.970         | <b>-6.49</b>                 | --                          | <b>1.92*10<sup>-5</sup></b> | 261.1                       | 56.5           |
| <i>Open Terrestrial</i>      | <b>-8.26</b>   | -2.64                        | <b>-7.034</b>               | --                          | 423.5                       | 82.1           |

247

248 (f) Average and maximum depth, but not minimum depth, influenced sensitivity to blue but  
249 not red light

250 Species living at deeper average depth had longer shortest  $\lambda_{\max}$  than shallow-living species ( $p =$   
251  $0.046$ ,  $t = 2.03$ ; see the electronic supplementary material: figure S3a). Additionally, species  
252 living at a deeper maximum depth had shortest  $\lambda_{\max}$  that were longer than shallow-living species  
253 shortest  $\lambda_{\max}$  ( $p = 0.033$ ,  $t = 2.18$ ; electronic supplementary material: figure S4). Average depth  
254 and minimum depth did not affect species' longest  $\lambda_{\max}$  or range of  $\lambda_{\max}$ , and there was no effect  
255 of maximum depth on spectral sensitivity (electronic supplementary material: figures S3b-c and  
256 S5). Controlling for phylogeny removes the effect of average depth on shortest  $\lambda_{\max}$  (phylolm:  $t =$   
257  $-4.688 \cdot 10^{-1}$ ,  $p = 0.641$ ).

258

259 (g) Animals in coastal and freshwater habitats saw shorter wavelengths while animals in  
260 forest+intermediate or open-canopy habitats saw longer wavelengths

261 We found that coastal animals' and freshwater animals' shortest  $\lambda_{\max}$  were shorter than both  
262 forest+intermediate animals' shortest  $\lambda_{\max}$  and open terrestrial animals' shortest  $\lambda_{\max}$  (omnibus test:  
263  $p = 1.359 \cdot 10^{-12}$ ,  $\chi^2 = 53.296$ ,  $df = 3$ , pair-wise comparisons: table 2; figure 2). We also found that  
264 forest+intermediate animals' longest  $\lambda_{\max}$  and open terrestrial animals' longest  $\lambda_{\max}$  were longer  
265 than freshwater animals' and coastal animals' longest  $\lambda_{\max}$  (omnibus test:  $p = 1.19 \cdot 10^{-14}$ ,  $\chi^2 = 67.92$ ,  
266  $df = 3$ ; pairwise comparisons: table 3 and figure 2).

267

268 (h) Open terrestrial animals had a broader visual range than coastal animals

269 We found that open terrestrial animals had a larger range (longest  $\lambda_{\max}$  – shortest  $\lambda_{\max}$ ) than coastal  
 270 animals, but all other habitat groups were statistically similar (omnibus test:  $p = 0.03366$ ,  $\chi^2 =$   
 271  $8.6931$ ,  $df = 3$ ; pairwise comparisons: table 4).

**Table 3.** Effect of habitat greenness on longest  $\lambda_{\max}$ . P-values are above diagonal; q-values are below diagonal. Numbers in bold are statistically significant.

| q \ p                 | Coastal      | Forest + Intermediate                   | Freshwater                              | Open Terrestrial                         | Mean (nm) | SD (nm) |
|-----------------------|--------------|-----------------------------------------|-----------------------------------------|------------------------------------------|-----------|---------|
| Coastal               | --           | <b><math>1.72 \times 10^{-7}</math></b> | 0.77                                    | <b><math>6.23 \times 10^{-10}</math></b> | 297.3     | 72.4    |
| Forest + Intermediate | <b>-7.82</b> | --                                      | <b><math>7.54 \times 10^{-6}</math></b> | 0.22                                     | 547.1     | 17.7    |
| Freshwater            | -2.40        | <b>-6.85</b>                            | --                                      | <b><math>2.77 \times 10^{-5}</math></b>  | 314.3     | 73.8    |
| Open Terrestrial      | <b>-9.14</b> | -2.71                                   | <b>-7.73</b>                            | --                                       | 534.1     | 49.1    |

272

273 (i) Accounting for lineage removed the effects of water and dissolved particles on visual  
 274 pigment sensitivity

275 Controlling for phylogeny removed the effect of habitat greenness on shortest  $\lambda_{\max}$ , longest  $\lambda_{\max}$ ,  
 276 and  $\lambda_{\max}$  range (table 5), even when we accounted for the species absent from our phylogenetic  
 277 tree (see the electronic supplementary material: tables S6 – S8).

**Table 4.** Effect of habitat greenness on  $\lambda_{\max}$  range. P-values are above diagonal; q-values are below diagonal. Numbers in bold are statistically significant.

| q \ p                 | Coastal      | Forest + Intermediate | Freshwater | Open Terrestrial | Mean (nm) | SD (nm) |
|-----------------------|--------------|-----------------------|------------|------------------|-----------|---------|
| Coastal               | --           | 0.239                 | 0.411      | <b>0.0497</b>    | 42.88     | 70.2    |
| Forest + Intermediate | -2.65        | --                    | 0.827      | 0.756            | 76.63     | 72.6    |
| Freshwater            | -2.18        | -1.21                 | --         | 0.561            | 53.26     | 69.3    |
| Open Terrestrial      | <b>-3.64</b> | -1.40                 | -1.84      | --               | 110.6     | 98.9    |

278

279

| Comparison                          | Dependent variable        | t      | p      | SE     |
|-------------------------------------|---------------------------|--------|--------|--------|
| Coastal vs forest + intermediate    | Shortest $\lambda_{\max}$ | -0.576 | 0.566  | 253.78 |
| Coastal vs open terrestrial         | Shortest $\lambda_{\max}$ | -0.490 | 0.625  | 251.87 |
| Freshwater vs open terrestrial      | Shortest $\lambda_{\max}$ | -0.445 | 0.658  | 254.04 |
| Coastal vs open terrestrial         | Longest $\lambda_{\max}$  | -1.37  | 0.174  | 164.14 |
| Forest + intermediate vs freshwater | Longest $\lambda_{\max}$  | -1.74  | 0.0847 | 166.79 |
| Freshwater vs open terrestrial      | Longest $\lambda_{\max}$  | -1.69  | 0.0941 | 165.55 |
| Open terrestrial vs coastal         | $\lambda_{\max}$ Range    | -0.397 | 0.692  | 255.87 |

280

#### 281 **(4) Discussion**

282

283 *(a) The transition from aquatic to terrestrial habitats has influenced animal vision*

284 We found that terrestrial species see longer long-wavelength light and a larger range of colours  
285 overall compared to aquatic species. Few other studies have broadly investigated the effect of  
286 animals' evolutionary transitions between aquatic and terrestrial habitats on colour vision.  
287 However, transitions from aquatic to terrestrial life stages that lead to the development of different  
288 visual abilities can indicate whether differences between terrestrial and aquatic lifestyles  
289 themselves necessitate different strategies for perceiving the world [49]. Such studies have been  
290 conducted within single species: for example, in several species of dragonflies, adults have short  
291 wavelength-shifted vision, express more visual pigments than larvae, and have dorsal eye regions  
292 specialized to detect shorter wavelengths of light refracted from the sky [49,50]. Similar types of  
293 visual shifts have been observed in southern leopard frogs [66]. Just as animal development  
294 favours the expression of environmentally matched opsins over an intra-generational timescale,  
295 our results suggest that evolutionary adaptation favours the use of environmentally matched opsins  
296 over an inter-generational timescale.



297

298 The results of our terrestrial vs. aquatic models are congruent with the visual tuning hypothesis,  
299 that animal visual systems undergo adaptation to best detect the light most often present in their  
300 environments [23]. Terrestrial animals are exposed to a dynamic range of colours that changes  
301 throughout the day, including both short and long-wavelength light, as well as ultraviolet light in  
302 large forest gaps and open environments [25,26]. By contrast, aquatic animals, which we found to  
303 be less sensitive to long-wavelength and ultraviolet light, live in environments that are exposed to  
304 relatively less long-wavelength and ultraviolet light [24]. Absent phylogenetic controls, our  
305 regressions suggest that animals are likely to be maximally sensitive to colours most often present  
306 in their environment, and insensitive to colours likely to be absent.

307

308 *(b) Canopy coverage does not influence visual tuning*

309 We found that animals which live in densely forested environments do not differ in their visual  
310 sensitivities from animals that live in open, prairie-like habitats. Although the forest light  
311 environment directly beneath the canopy is dominated by middle wavelengths (i.e., greens and  
312 yellows) under most conditions [25,26], spatial and temporal variations in forest light's spectral  
313 qualities may require forest animals to possess visual sensitivities similar to those of animals living  
314 in open habitats.

315

316 Additionally, animals may choose to use light microhabitats which are suitable to their current  
317 visual physiology. Endler and Théry observed that forest birds use areas in which they are most  
318 conspicuous to advertise to potential mates [67]. Some species also modify their habitats to

319 improve the visibility of their visual displays. For example, male golden-collared manakins clean  
320 the arenas they use to court females; the background of a cleaned arena contrasts better with male  
321 manakins' plumage than the background of the forest surrounding the arena [68]. Arena cleaning  
322 also seems to improve white-bearded manakins' ability to detect predators [69]. In such cases,  
323 evolution may be driving site preferences which match vision rather than driving vision to match  
324 site preferences, a complete reversal of the mechanism being investigated in our study.

325

326 *(c) The ciliary/rhabdomeric opsin divergence may impact the colours that animals can see*

327 We found that animals that use rhabdomeric opsins for vision see a broader range of wavelengths  
328 of light than animals that use ciliary opsins for vision. Many animals that use rhabdomeric  
329 photoreceptors for vision, especially arthropods, have opsins that are maximally sensitive to  
330 ultraviolet light [31,70–75]. By contrast, comparatively few animals that use ciliary photoreceptors  
331 for vision have opsins that are maximally sensitive to UV light, although several species of birds  
332 and fish are sensitive to ultraviolet light [40,76–78]. Additionally, many mammals that utilize high  
333 acuity colour vision and whose short wavelength sensitive photoreceptors are sensitive to UV light,  
334 have corneas that selectively filter UV, inhibiting their ability to see those wavelengths [79,80].  
335 Both ciliary and rhabdomeric opsins are thought to have been present in the urbilaterian, the  
336 common ancestor of all modern animals save sponges, cnidarians, placozoans, and ctenophores  
337 [55]. The emergence in chordates of ciliary opsins for vision rather than photoentrainment  
338 represents a singular event, one that may have also heralded differences in visual perception  
339 associated with reduced sensitivity to short wavelengths of light.

340

341 *(d) Phylogeny outweighs the effect of habitat*

342 We found that the effects of habitat upon the spectrum of light animals can see were reduced once  
343 we controlled for phylogenetic history. These findings differ from those of studies looking at  
344 individual animal clades. For example, a 2018 survey of ray-finned fish found that species living  
345 at depth have reduced chromacy even after controlling for phylogeny [47]. Similarly, a historic  
346 study of cottoid fish in Lake Baikal found that there was a correlation between  $\lambda_{\max}$  and habitat  
347 depth [81]. While studies of marine mammals found that species that forage near the surface have  
348 visual pigments that resemble those of terrestrial mammals while those that foraged at depth had  
349 visual pigments with amino acid substitutions that shifted the  $\lambda_{\max}$  towards shorter wavelengths  
350 [82]. We found that, when expanding to include multiple clades – both chordates and non-  
351 chordates – a similar pattern emerged: terrestrial species had broader sensitivity to light and more  
352 sensitivity to long wavelengths of light compared to aquatic animals. However, these effects are  
353 lost once we account for phylogeny. This loss of an effect might be because the historical  
354 divergence between the visual pigments used by vertebrates and invertebrates is an important  
355 limiting factor on the degree to which visual pigments can accommodate for light environment,  
356 something that would not be detected in analyses limited to vertebrates.

357

358 The effect of the c-opsin/ r-opsin divergence is lost once we account for phylogeny in our analyses,  
359 but since this transition happened once and maps onto the metazoan phylogenetic tree, this loss of  
360 effect might be expected. Outside of this transition, opsin evolutionary history such as mutation  
361 biases may account for the effect of phylogeny on visual ability in our analysis. Retinal is  
362 covalently bonded to opsin *via* a Schiff base and the charge of the amino acid residues near the  
363 Schiff base influence the ability of retinal to change conformation and  $\lambda_{\max}$  of the associated opsin

364 [83,84], which has been experimentally confirmed using directed mutagenesis [37,85,86]. Future  
365 research should consider whether there are inherent differences in the electronic charge of the  
366 binding pocket between ciliary and rhabdomeric type opsins. Additionally, studies examining  
367 whether non-opsin means of visual tuning, including the differential absorption of light by  
368 screening pigments, differ between animals which use ciliary and rhabdomeric opsins and which  
369 live in the same light environment may prove particularly illuminating.

370

371 *(e) Conclusions*

372 Here we used visual sensitivity data from nearly 450 animal species and 3 phyla to conduct a  
373 systematic survey of the effects of habitat light on the colours animals can see. We found that  
374 terrestrial animals and aquatic animals possess different ranges of spectral sensitivity from each  
375 other, but that evolutionary processes such as the c-opsin/r-opsin divergence may have limited  
376 chordates' ability to tune their opsins to short-wavelength light. Additionally, the eyes of animals  
377 living in terrestrial habitats are not specifically tuned to forest canopy cover. Future research  
378 should consider whether inherent differences between chordate and non-chordate opsin amino acid  
379 sequences, or downstream neural signalling, are responsible for the evolutionary limitations to  
380 visual tuning.

381 *Acknowledgments*

382 We would like to thank Adam Siepielski for training in systematic analysis, Jeremy Beaulieu for  
383 advice on conducting phylogenetically weighted regressions, and Nagayasu Nakanishi for his  
384 valuable feedback on early versions of this project and manuscript.

385

386 *Data Accessibility:*

387 Data pertaining to this study are available in the supplementary materials or available at Dryad  
388 repository <https://doi.org/10.5061/dryad.47d7wm3fc>. Code pertaining to this study is available at  
389 GitHub repository: <https://github.com/mjosmurphy/opsin-evolutionary-ecology>.

390

391 *Funding*

392 This project was partially supported by the University of Arkansas and by an Arkansas Biosciences  
393 Institute grant to ELW.

394

395 **REFERENCES**

- 396 1. Uetz GW, Roberts JA, Taylor PW. 2009 Multimodal communication and mate choice in  
397 wolf spiders: female response to multimodal versus unimodal signals. *Anim. Behav.* **78**,  
398 299–305. (doi:10.1016/j.anbehav.2009.04.023)
- 399 2. Thurman TJ, Seymoure BM. 2015 A bird’s eye view of two mimetic tropical butterflies:  
400 coloration matches predator’s sensitivity. *J. Zool.* **298**, 159–168. (doi:10.1111/jzo.12305)
- 401 3. Lindström L, Rowe C, Guilford T. 2001 Pyrazine odour makes visually conspicuous prey  
402 aversive. *Proc. R. Soc. B* **268**, 159–162. (doi:10.1098/rspb.2000.1344)
- 403 4. Endler JA. 1978 A Predator’s View of Animal Color Patterns. In *Evolutionary Biology*,  
404 *Vol. 11* (eds MK Hecht, WC Steere, B Wallace), pp. 319–364.
- 405 5. Cheroske AG, Cronin TW, Durham MF, Caldwell RL. 2009 Adaptive signalling  
406 behaviour in stomatopods under varying light conditions. *Mar. Freshw. Behav. Physiol.*  
407 **42**, 219–232. (doi:https://doi.org/10.1080/10236240903169222)
- 408 6. Endler JA. 1992 Signals, signal conditions, and the direction of evolution. *Am. Nat.* **139**,  
409 S125–S153. (doi:https://doi.org/10.1086/285308)
- 410 7. Guilford T, Dawkins MS. 1991 Receiver psychology and the evolution of animal signals.  
411 *Anim. Behav.* **42**, 1–14. (doi:https://doi.org/10.1016/S0003-3472(05)80600-1)
- 412 8. Majerus MEN, Brunton CFA, Stalker J. 2000 A bird’s eye view of the peppered moth. *J.*  
413 *Evol. Biol.* **13**, 155–159. (doi:https://doi.org/10.1046/j.1420-9101.2000.00170.x)
- 414 9. Cook LM, Grant BS, Saccheri IJ. 2012 Selective bird predation on the peppered moth: the  
415 last experiment of Michael Majerus. *Biol. Lett.* **8**, 609–612.

- 416 (doi:<https://doi.org/10.1098/rsbl.2011.1136>)
- 417 10. Johnsen S, Sosik HM. 2003 Cryptic coloration and mirrored sides as camouflage  
418 strategies in near-surface pelagic habitats: Implications for foraging and predator  
419 avoidance. *Limnol. Oceanogr.* **48**, 1277–1288. (doi:10.4319/lo.2003.48.3.1277)
- 420 11. Johnsen S. 2005 The red and the black: Bioluminescence and the color of animals in the  
421 deep sea. *Integr. Comp. Biol.* **45**, 234–246. (doi:10.1093/icb/45.2.234)
- 422 12. Harmon JP, Losey E. 1998 The role of vision and color in the close proximity foraging  
423 behavior of four coccinellid species. *Oecologia* **115**, 287–292.  
424 (doi:<https://doi.org/10.1007/s004420050518>)
- 425 13. Endler JA, Day LB. 2006 Ornament colour selection, visual contrast and the shape of  
426 colour preference functions in great bowerbirds, *Chlamydera nuchalis*. *Anim. Behav.* **72**,  
427 1405–1416. (doi:10.1016/j.anbehav.2006.05.005)
- 428 14. Heindl M, Winkler H. 2003 Female Canaries (*Serinus canaria*) Associate more with  
429 Males that Contrast Strongly against the Background. *Ethology* **109**, 259–271.  
430 (doi:<http://dx.doi.org/10.1046/j.1439-0310.2003.00869.x>)
- 431 15. Fleishman LJ, Wadman CS, Maximov KJ. 2020 The interacting effects of total light  
432 intensity and chromatic contrast on visual signal visibility in an *Anolis* lizard. *Anim.*  
433 *Behav.* **167**, 263–273. (doi:10.1016/j.anbehav.2020.07.008)
- 434 16. Gomez D, Théry M. 2004 Influence of ambient light on the evolution of colour signals:  
435 Comparative analysis of a Neotropical rainforest bird community. *Ecol. Lett.* **7**, 279–284.  
436 (doi:10.1111/j.1461-0248.2004.00584.x)

- 437 17. Pincebourde S, Théry M, Feer F. 2008 Dusk light environment optimizes visual  
438 perception of conspecifics in a crepuscular horned beetle. *Behav. Ecol.* **29**, 627–634.  
439 (doi:10.1093/beheco/arn024)
- 440 18. Endler JA, Théry M. 1996 Interacting effects of lek placement, display behavior, ambient  
441 light, and color patterns in three neotropical forest-dwelling birds. *Am. Nat.* **148**, 421–452.  
442 (doi:10.1086/285934)
- 443 19. Håstad O, Victorsson J, Ödeen A. 2005 Differences in color vision make passerines less  
444 conspicuous in the eyes of their predators. *Proc. Natl. Acad. Sci.* **102**, 6391–6394.  
445 (doi:<https://doi.org/10.1073/pnas.0409228102>)
- 446 20. Cole GL, Endler JA. 2016 Male courtship decisions are influenced by light environment  
447 and female receptivity. *Proc. R. Soc. B* **283**, 20160861.  
448 (doi:<http://dx.doi.org/10.1098/rspb.2016.0861>)
- 449 21. Marshall KLA, Stevens M. 2014 Wall lizards display conspicuous signals to conspecifics  
450 and reduce detection by avian predators. *Behav. Ecol.* **25**, 1325–1337.  
451 (doi:10.1093/beheco/aru126)
- 452 22. Sherratt TN, Beatty CD. 2003 The Evolution of Warning Signals as Reliable Indicators of  
453 Prey Defense. *Am. Nat.* **162**, 377–389. (doi:10.1086/378047)
- 454 23. Cronin TW, Johnsen S, Marshall NJ, Warrant EJ. 2014 *Visual Ecology*. Princeton, NJ:  
455 Princeton University Press.
- 456 24. Lythgoe JN. 1979 *The Ecology of Vision*. New York: Oxford University Press.
- 457 25. Endler JA. 1993 The color of light in forests and its implications. *Ecol. Monogr.* **63**, 1–27.



- 458 (doi:<https://doi.org/10.2307/2937121>)
- 459 26. Federer CA, Tanner CB. 1966 Spectral Distribution of Light in the Forest. *Ecology* **47**,  
460 555–560. (doi:<https://doi.org/10.2307/1933932>)
- 461 27. Arikawa K, Stavenga D. 1997 Random array of colour filters in the eyes of butterflies. *J.*  
462 *Exp. Biol.* **200**, 2501–256. (doi:<https://doi.org/10.1242/jeb.200.19.2501>)
- 463 28. Arikawa K, Scholten DGW, Kinoshita M, Stavenga DG, Arikawa K, Scholten DGW,  
464 Kinoshita M. 1999 Tuning of Photoreceptor Spectral Sensitivities by Red and Yellow  
465 Pigments in the Butterfly *Papilio xuthus* Tuning of Photoreceptor Spectral Sensitivities by  
466 Red and Yellow Pigments in the Butterfly *Papilio xuthus*. *Zoolog. Sci.* **16**, 17–24.  
467 (doi:<https://doi.org/10.2108/zsj.16.17>)
- 468 29. Stavenga DG, Arikawa K. 2006 Evolution of color and vision of butterflies. *Arthropod*  
469 *Struct. Dev.* **35**, 307–318. (doi:[10.1016/j.asd.2006.08.011](https://doi.org/10.1016/j.asd.2006.08.011))
- 470 30. Stavenga DG. 2002 Reflections on colourful ommatidia of butterfly eyes. *J. Exp. Biol.*  
471 **205**, 1077–1085. (doi:<https://doi.org/10.1242/jeb.205.8.1077>)
- 472 31. Cronin TW, Marshall NJ. 1989 Multiple spectral classes of photoreceptors in the retinas  
473 of gonodactyloid stomatopod crustaceans. *J. Comp. Physiol. A* **166**, 261–275.  
474 (doi:[10.1007/BF00193471](https://doi.org/10.1007/BF00193471))
- 475 32. Ogawa Y, Awata H, Wakakuwa M, Kinoshita M, Stavenga DG, Arikawa K. 2012  
476 Coexpression of three middle wavelength-absorbing visual pigments in sexually  
477 dimorphic photoreceptors of the butterfly *Colias erate*. *J. Comp. Physiol. A Neuroethol.*  
478 *Sensory, Neural, Behav. Physiol.* **198**, 857–867. (doi:[10.1007/s00359-012-0756-8](https://doi.org/10.1007/s00359-012-0756-8))

- 479 33. Hart NS, Partridge JC, Cuthill IC. 1999 Visual pigments, cone oil droplets, ocular media  
480 and predicted spectral sensitivity in the domestic turkey (*Meleagris gallopavo*). *Vision*  
481 *Res.* **39**, 3321–3328. (doi:[https://doi.org/10.1016/S0042-6989\(99\)00071-1](https://doi.org/10.1016/S0042-6989(99)00071-1))
- 482 34. Hart NS. 2004 Microspectrophotometry of visual pigments and oil droplets in a marine  
483 bird, the wedge-tailed shearwater *Puffinus pacificus*: topographic variations in  
484 photoreceptor spectral characteristics. *J. Exp. Biol.* **207**, 1229–1240.  
485 (doi:[10.1242/jeb.00857](https://doi.org/10.1242/jeb.00857))
- 486 35. Beason RC, Loew ER. 2008 Visual pigment and oil droplet characteristics of the bobolink  
487 (*Dolichonyx oryzivorus*), a new world migratory bird. *Vision Res.* **48**, 1–8.  
488 (doi:[10.1016/j.visres.2007.10.006](https://doi.org/10.1016/j.visres.2007.10.006))
- 489 36. Yokoyama S, Radlwimmer FB, Blow NS. 2000 Ultraviolet pigments in birds evolved  
490 from violet pigments by a single amino acid change. *Proc. Natl. Acad. Sci.* **97**, 7366–  
491 7371. (doi:<https://doi.org/10.1073/pnas.97.13.7366>)
- 492 37. Yokoyama R, Knox BE, Yokoyama S. 1995 Rhodopsin from the fish, *Astyanax*: Role of  
493 tyrosine 261 in the red shift. *Investig. Ophthalmol. Vis. Sci.* **36**, 939–945.
- 494 38. Carvalho LS, Cowing JA, Wilkie SE, Bowmaker JK, Hunt DM. 2007 The molecular  
495 evolution of avian ultraviolet- and violet-sensitive visual pigments. *Mol. Biol. Evol.* **24**,  
496 1843–1852. (doi:[10.1093/molbev/msm109](https://doi.org/10.1093/molbev/msm109))
- 497 39. Butlin R *et al.* 2012 What do we need to know about speciation? *Trends Ecol. Evol.* **27**,  
498 27–39. (doi:[10.1016/j.tree.2011.09.002](https://doi.org/10.1016/j.tree.2011.09.002))
- 499 40. Van Hazel I, Sabouhianian A, Day L, Endler JA, Chang BS. 2013 Functional

- 500 characterization of spectral tuning mechanisms in the great bowerbird short-wavelength  
501 sensitive visual pigment (SWS1), and the origins of UV/violet vision in passerines and  
502 parrots. *BMC Evol. Biol.* **13**. (doi:10.1186/1471-2148-13-250)
- 503 41. Townson SM, Chang BSW, Salcedo E, Chadwell L V, Pierce NE, Britt SG. 1998  
504 Honeybee Blue- and Ultraviolet-Sensitive Opsins: Cloning, Heterologous Expression in  
505 *Drosophila*, and Physiological Characterization. **18**, 2412–2422.  
506 (doi:<https://doi.org/10.1523/JNEUROSCI.18-07-02412.1998>)
- 507 42. Yokoyama S. 2002 Molecular bases of color vision in vertebrates. *Genes Genet. Syst.* **74**,  
508 189–199. (doi:10.1266/ggs.74.189)
- 509 43. Yokoyama S, Bernhard Radlwimmer F. 2001 The molecular genetics and evolution of red  
510 and green color vision in vertebrates. *Genetics* **158**, 1697–1710.
- 511 44. Frentiu FD, Briscoe AD. 2008 A butterfly eye’s view of birds. *BioEssays* **30**, 1151–1162.  
512 (doi:10.1002/bies.20828)
- 513 45. Hunt DM, Wilkie SE, Bowmaker JK, Poopalasundaram S. 2001 Vision in the ultraviolet.  
514 *Cell. Mol. Life Sci.* **58**, 1583–1598. (doi:10.1007/PL00000798)
- 515 46. Fasick JI, Robinson PR. 2000 Spectral-tuning mechanisms of marine mammal rhodopsins  
516 and correlations with foraging depth. *Vis. Neurosci.* **17**, 781–788.  
517 (doi:10.1017/S095252380017511X)
- 518 47. Schweikert LE, Fitak RR, Caves EM, Sutton TT, Johnsen S. 2018 Spectral sensitivity in  
519 ray-finned fishes: diversity, ecology, and shared descent. *J. Exp. Biol.* , jeb.189761.  
520 (doi:10.1242/jeb.189761)

- 521 48. Partridge JC, Shand J, Archer SN, van Groningen-Luyben WAH. 1989 Interspecific  
522 variation in the visual pigments of deep-sea fishes. *J. Comp. Physiol. A* **164**, 513–529.  
523 (doi:<https://doi.org/10.1007/BF00610445>)
- 524 49. Chou A, Lin C, Cronin TW. 2020 Visual metamorphoses in insects and malacostracans:  
525 Transitions between an aquatic and terrestrial life. *Arthropod Struct. Dev.* **59**, 100974.  
526 (doi:[10.1016/j.asd.2020.100974](https://doi.org/10.1016/j.asd.2020.100974))
- 527 50. Futahashi R, Kawahara-miki R, Kinoshita M, Yoshitake K, Yajima S. 2015 Extraordinary  
528 diversity of visual opsin genes in dragonflies. (doi:[10.1073/pnas.1424670112](https://doi.org/10.1073/pnas.1424670112))
- 529 51. Almudi I *et al.* 2020 Genomic adaptations to aquatic and aerial life in mayflies and the  
530 origin of insect wings. *Nat. Commun.* **11**, 1–11. (doi:[10.1038/s41467-020-16284-8](https://doi.org/10.1038/s41467-020-16284-8))
- 531 52. Schott RK, Bell RC, Loew ER, Thomas KN, Gower DJ, Streicher JW, Fujita MK. 2021  
532 Genomic and Spectral Visual Adaptation in Southern Leopard Frogs during the  
533 Ontogenetic Transition from Aquatic to Terrestrial Light Environments. *bioRxiv Prepr.*  
534 (doi:<https://doi.org/10.1101/2021.02.19.432049>)
- 535 53. Labhart T, Nilsson DE. 1995 The dorsal eye of the dragonfly *Sympetrum*: specializations  
536 for prey detection against the blue sky. *J. Comp. Physiol. A* **176**, 437–453.  
537 (doi:[10.1007/BF00196410](https://doi.org/10.1007/BF00196410))
- 538 54. Porter ML, Blasic JR, Bok MJ, Cameron EG, Pringle T, Cronin TW, Robinson PR. 2011  
539 Shedding new light on opsin evolution. *Proc. R. Soc. B Biol. Sci.* **279**, 3–14.  
540 (doi:[10.1098/rspb.2011.1819](https://doi.org/10.1098/rspb.2011.1819))
- 541 55. Arendt D, Wittbrodt J. 2001 Reconstructing the eyes of Urbilateria. **1563**.

- 542 (doi:10.1098/rstb.2001.0971)
- 543 56. Ullmann JFP, Gallagher T, Hart NS, Barnes AC, Smullen RP, Collin SP, Temple SE.  
544 2011 Tank color increases growth, and alters color preference and spectral sensitivity, in  
545 barramundi (*Lates calcarifer*). *Aquaculture* **322–323**, 235–240.  
546 (doi:10.1016/j.aquaculture.2011.10.005)
- 547 57. Fuller RC, Claricoates KM. 2011 Rapid light-induced shifts in opsin expression: Finding  
548 new opsins, discerning mechanisms of change, and implications for visual sensitivity.  
549 *Mol. Ecol.* **20**, 3321–3335. (doi:10.1111/j.1365-294X.2011.05180.x)
- 550 58. Nowak RM. 1983 *Walker's Mammals of the World*. 4th edn. Baltimore: Johns Hopkins  
551 University Press.
- 552 59. Opler PA, Malikul V. 1999 *A Field Guide to Eastern Butterflies*. Houghton Mifflin  
553 Harcourt.
- 554 60. Opler PA. 1999 *A Field Guide to Butterflies of Western North America*. Houghton Mifflin  
555 Harcourt.
- 556 61. Hinchliff C *et al.* 2015 Synthesis of phylogeny and taxonomy into a comprehensive tree of  
557 life. *Proc. Natl. Acad. Sci.* **112**, 12764–12769.  
558 (doi:<https://doi.org/10.1073/pnas.1423041112>)
- 559 62. Revell LJ. 2012 phytools: An R package for phylogenetic comparative biology (and other  
560 things). *Methods Ecol. Evol.* **3**. (doi:10.1111/j.2041-210X.2011.00169.x)
- 561 63. Paradis E, Schliep K. 2018 ape 5.0: an environment for modern phylogenetics and  
562 evolutionary analyses in R. *Bioinformatics* **35**, 526–528.

- 563 (doi:<https://doi.org/10.1093/bioinformatics/bty633>)
- 564 64. Ho L, Ane C. 2014 A linear-time algorithm for Gaussian and non-Gaussian trait evolution  
565 models. *Syst. Biol.* **63**, 397–408. (doi:<https://doi.org/10.1093/sysbio/syu005>)
- 566 65. Pohlert T. 2020 PMCMRplus: Calculate Pairwise Multiple Comparisons of Mean Rank  
567 Sums Extended.
- 568 66. Schott RK, Bell RC, Loew ER, Thomas KN, Gower DJ, Streicher JW, Fujita MK. 2021  
569 Genomic and Spectral Visual Adaptation in Southern Leopard Frogs during the  
570 Ontogenetic Transition from Aquatic to Terrestrial Light Environments. *bioRxiv Prepr.*  
571 (doi:<https://doi.org/10.1101/2021.02.19.432049>)
- 572 67. Endler J, Théry M. 1996 Interacting effects of lek placement, display behavior, ambient  
573 light, and color patterns in three Neotropical forest-dwelling birds. *Am. Nat.* **148**, 421–  
574 452. (doi:<https://doi.org/10.1086/285934>)
- 575 68. Uy JAC, Endler JA. 2004 Modification of the visual background increases the  
576 conspicuousness of golden-collared manakin displays. *Behav. Ecol.* **15**, 1003–1010.  
577 (doi:10.1093/beheco/arh106)
- 578 69. Cestari C, Aurélio Pizo M. 2014 Court cleaning behavior of the White-Bearded Manakin  
579 (*Manacus manacus*) and a test of the anti-predation hypothesis. *Wilson J. Ornithol.* **126**,  
580 98–104. (doi:<https://doi.org/10.1676/13-032.1>)
- 581 70. Yang E, Osorio D. 1991 Spectral sensitivities of photoreceptors and lamina monopolar  
582 cells in the dragonfly, *Hemicordula tau*. *J. Comp. Physiol. A* **169**, 663–669.  
583 (doi:<https://doi.org/10.1007/BF00194895>)

- 584 71. Bybee SM, Yuan F, Ramstetter MD, Llorente-Bousquets J, Reed RD, Osorio D, Briscoe  
585 AD. 2012 UV Photoreceptors and UV-Yellow Wing Pigments in *Heliconius* Butterflies  
586 Allow a Color Signal to Serve both Mimicry and Intraspecific Communication. *Am. Nat.*  
587 **179**, 38–51. (doi:10.1086/663192)
- 588 72. Briscoe AD. 2008 Reconstructing the ancestral butterfly eye: focus on the opsins. *J. Exp.*  
589 *Biol.* **211**, 1805–1813. (doi:10.1242/jeb.013045)
- 590 73. Everett A, Tong X, Briscoe AD, Monteiro A. 2012 Phenotypic plasticity in opsin  
591 expression in a butterfly compound eye complements sex role reversal. *BMC Evol. Biol.*  
592 **12**. (doi:10.1186/1471-2148-12-232)
- 593 74. Arikawa K, Stavenga DG. 2014 Insect photopigments: photoreceptor spectral sensitivities  
594 and visual adaptations. In *Evolution of Visual and Non-Visual Pigments* (eds DM Hunt,  
595 MW Hankins, SP Collin, NJ Marshall), pp. 1–276. (doi:10.1007/978-1-4614-4355-1)
- 596 75. Arikawa K. 2005 Sexual Dimorphism of Short-Wavelength Photoreceptors in the Small  
597 White Butterfly, *Pieris rapae crucivora*. *J. Neurosci.* **25**, 5935–5942.  
598 (doi:10.1523/JNEUROSCI.1364-05.2005)
- 599 76. Carvalho LS, Knott B, Berg ML, Bennett ATD, Hunt DM. 2011 Ultraviolet-sensitive  
600 vision in long-lived birds. *Proc. R. Soc. B Biol. Sci.* **278**, 107–114.  
601 (doi:10.1098/rspb.2010.1100)
- 602 77. Losey GS, Cronin TW, Goldsmith TH, Hyde D, Marshall NJ, McFarland WN. 1999 The  
603 UV visual world of fishes: a review. *J. Fish Biol.* **54**, 921–943.  
604 (doi:<https://doi.org/10.1111/j.1095-8649.1999.tb00848.x>)

- 605 78. Marshall NJ, Jennings K, McFarland WN, Loew ER, Losey GS. 2003 Visual Biology of  
606 Hawaiian Coral Reef Fishes. II. Colors of Hawaiian Coral Reef Fish. *Copeia* **2003**, 455–  
607 466. (doi:10.1643/01-055)
- 608 79. Douglas RH, Jeffery G. 2014 The spectral transmission of ocular media suggests  
609 ultraviolet sensitivity is widespread among mammals. *Proc. R. Soc. B Biol. Sci.* **281**,  
610 20132995–20132995. (doi:10.1098/rspb.2013.2995)
- 611 80. Hogg C, Neveu M, Stokkan K-A, Folkow L, Cottrill P, Douglas R, Hunt DM, Jeffery G.  
612 2011 Arctic reindeer extend their visual range into the ultraviolet. *J. Exp. Biol.* **214**, 2014–  
613 2019. (doi:10.1242/jeb.053553)
- 614 81. Bowmaker JK, Govardovskii VI, Shukolyukov SA, L.V. Zueva J, Hunt DM, Sideleva VG,  
615 Smirnova OG. 1994 Visual pigments and the photic environment: The cottoid fish of Lake  
616 Baikal. *Vision Res.* **34**, 591–605. (doi:10.1016/0042-6989(94)90015-9)
- 617 82. Levenson DH, Ponganis PJ, Crognale MA, Deegan JF, Dizon A, Jacobs GH. 2006 Visual  
618 pigments of marine carnivores: Pinnipeds, polar bear, and sea otter. *J. Comp. Physiol. A*  
619 *Neuroethol. Sensory, Neural, Behav. Physiol.* **192**, 833–843. (doi:10.1007/s00359-006-  
620 0121-x)
- 621 83. Sekharan S, Katayama K, Kandori H, Morokuma K. 2012 Color vision: ‘OH-site’ rule for  
622 seeing red and green. *J. Am. Chem. Soc.* **134**, 10706–10712. (doi:10.1021/ja304820p)
- 623 84. Honig B, Greenberg AD, Dinur U, Ebrey TG. 1976 Visual-Pigment Spectra: Implications  
624 of the Protonation of the Retinal Schiff Base. *Biochemistry* **15**, 4593–4599.  
625 (doi:10.1021/bi00666a008)



- 626 85. Davies WL, Collin SP, Hunt DM. 2009 Adaptive gene loss reflects differences in the  
627 visual ecology of basal vertebrates. *Mol. Biol. Evol.* **26**, 1803–1809.  
628 (doi:10.1093/molbev/msp089)
- 629 86. Hiramatsu C, Radlwimmer FB, Yokoyama S, Kawamura S. 2004 Mutagenesis and  
630 reconstitution of middle-to-long-wave-sensitive visual pigments of New World monkeys  
631 for testing the tuning effect of residues at sites 229 and 233. *Vision Res.* **44**, 2225–2231.  
632 (doi:10.1016/j.visres.2004.04.008)
- 633

634

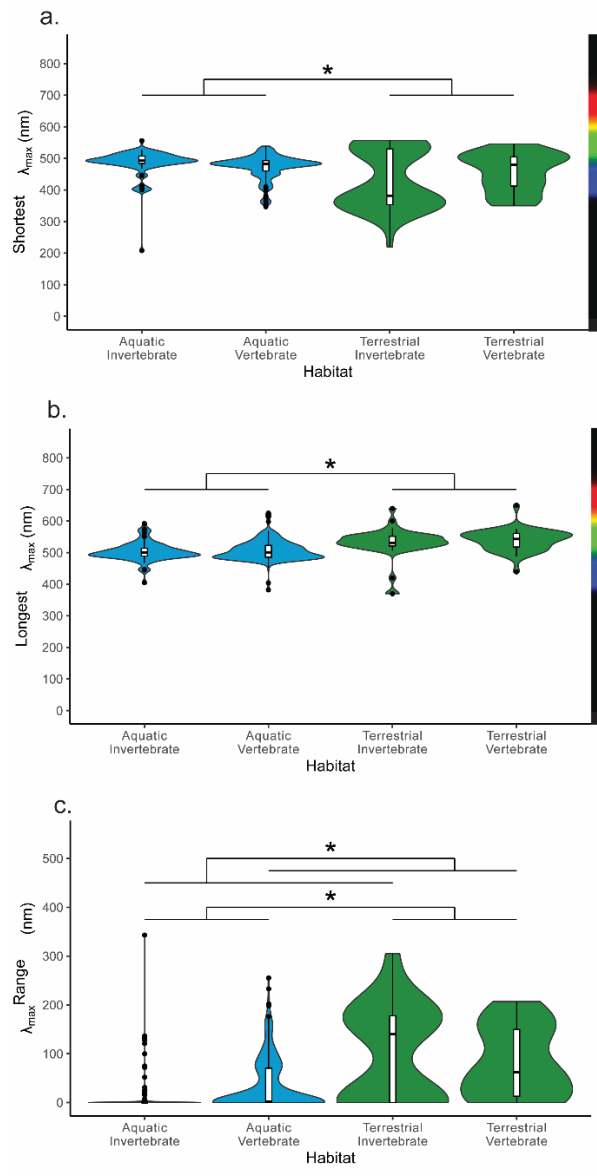

**Figure 1.** Effect of coarse habitat and lineage on mean visual pigment sensitivity, prior to phylogenetic control. A. Shortest opsin: Aquatic invertebrates:  $n = 78$ ,  $\mu = 485.3$  nm; Aquatic vertebrates:  $n = 273$ ,  $\mu = 473.0$  nm; Terrestrial invertebrates:  $n = 43$ ,  $\mu = 430.1$  nm; Terrestrial vertebrates:  $n = 39$ ,  $\mu = 456.1$  nm. B. Longest opsin: Aquatic invertebrates:  $n = 78$ ,  $\mu = 503.3$  nm; Aquatic vertebrates:  $n = 273$ ,  $\mu = 507.6$  nm; Terrestrial invertebrates:  $n = 43$ ,  $\mu = 530.3$  nm; Terrestrial vertebrates:  $n = 39$ ,  $\mu = 539.1$  nm. C. Opsin range: Aquatic invertebrates:  $n = 78$ ,  $\mu = 18.0$  nm; Aquatic vertebrates:  $n = 273$ ,  $\mu = 34.6$  nm; Terrestrial invertebrates:  $n = 43$ ,  $\mu = 100.2$  nm; Terrestrial vertebrates:  $n = 39$ ,  $\mu = 83.0$  nm. \*:  $p < 0.05$ .

635

636

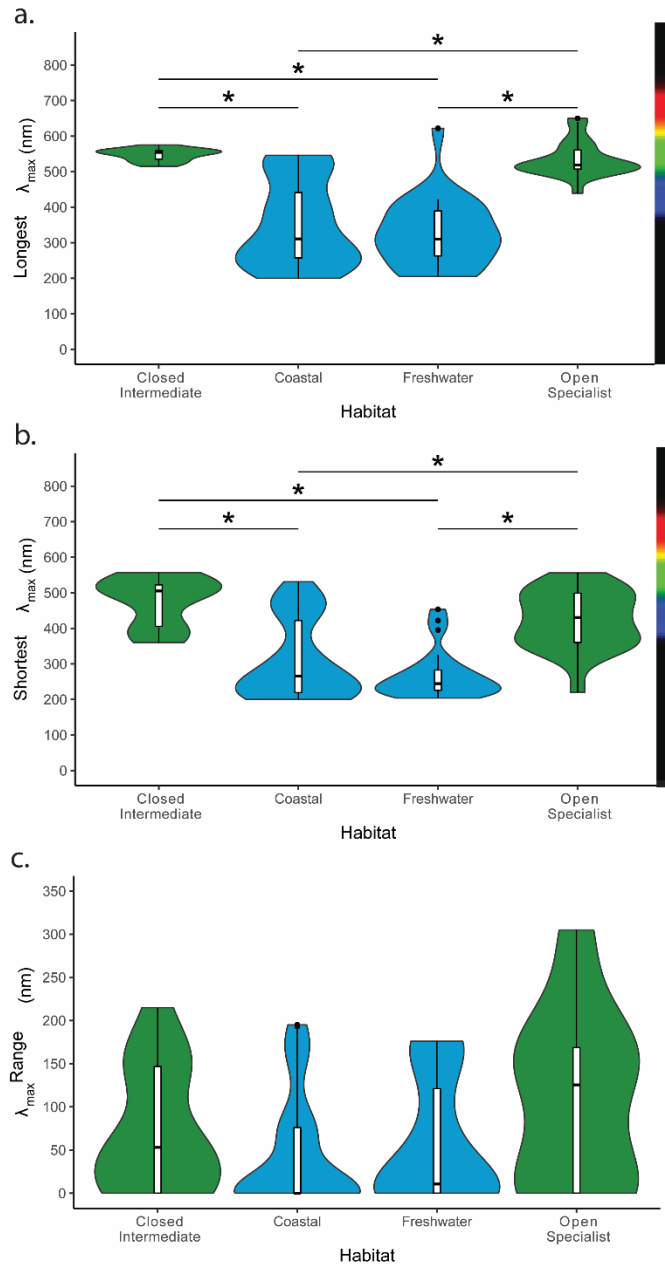

**Figure 2.** Effect of habitat greenness on visual sensitivities. A. Longest opsin: forest + intermediate:  $n = 14$ ,  $\mu = 547.1$  nm,  $sd = 17.71$  nm; coastal:  $n = 40$ ,  $\mu = 297.3$  nm,  $sd = 72.42$  nm; freshwater:  $n = 23$ ,  $\mu = 314.3$  nm,  $sd = 73.77$  nm; open terrestrial:  $n = 22$ ,  $\mu = 534.1$  nm,  $sd = 49.09$  nm; B. Shortest opsin: forest + intermediate:  $n = 14$ ,  $\mu = 470.4$  nm,  $sd = 60.00$  nm; coastal:  $n = 40$ ,  $\mu = 254.4$  nm,  $sd = 55.16$  nm; freshwater:  $n = 23$ ,  $\mu = 261.1$  nm,  $sd = 56.52$  nm; open terrestrial:  $n = 22$ ,  $\mu = 423.4$  nm,  $sd = 82.06$  nm C. Opsin range: forest + intermediate:  $n = 14$ ,  $\mu = 76.63$  nm,  $sd = 72.61$  nm; coastal:  $n = 40$ ,  $\mu = 742.88$  nm,  $sd = 70.15$  nm; freshwater:  $n = 23$ ,  $\mu = 53.26$  nm,  $sd = 69.30$  nm; open:  $n = 22$ ,  $\mu = 110.6$  nm,  $sd = 98.82$  nm. \*:  $p < 0.05$ .

637
